# Supplementary material
Source: PubMed Central journal article supplement (PMC1866956)
Supplement: NIHMS17506-supplement-supp.pdf [file NIHMS17506-supplement-supp.pdf]

## Supplemental Data

### Architecture of the 99 bp DNA-Six-Protein Regulatory Complex of the $\lambda$ *att* Site

Xingmin Sun, Dale F. Mierke, Tapan Biswas, Sang Yeol Lee, Arthur Landy and  
Marta Radman-Livaja

#### FRET Calculations

The determinations of the efficiency of energy transfer  $E$  and  $R_0$  and FRET calculations were performed as described (Radman-Livaja et al., 2005). The efficiency of energy transfer  $E$  was determined from the extent of donor fluorescence quenching in doubly labeled (donor and acceptor) P-arm bound with six proteins compared with donor-only-labeled P-arm bound with six proteins. Donor fluorescence quenching due to FRET is described by the following equation:

$$\frac{I_j^D - I_i^{DA}}{I_j^D} = 1 - \frac{[\text{complex}]_i^{DA}}{[\text{complex}]_j^D} (1 - rE), \quad [1]$$

where  $I_i^{DA}$  is the fluorescence intensity of a doubly labeled P-arm-protein complex,  $i$ .  $I_j^D$  is the fluorescence intensity of a donor-only labeled P-arm- protein complex.  $[\text{complex}]_i^{DA}$  and  $[\text{complex}]_j^D$  are the total amounts of doubly and singly labeled P-arm-protein complexes in bands  $i$  and  $j$ , respectively, and  $r$  is the efficiency of DNA labeling with the acceptor.

Eq.1 can be written as follows:

$$I_i^{DA} \frac{[\text{complex}]_j^D}{[\text{complex}]_i^{DA}} = I_j^D (1 - rE) \quad [2]$$

[complex] values were obtained from a Phosphorimager scan.  $E$  was obtained from the slope of the line formed by plotting  $I_i^{DA}[\text{complex}]_j^D / [\text{complex}]_i^{DA}$  against  $I_j^D$ , the slope being equal to  $(1-rE)$ . The value  $r$  was calculated from the absorbance spectrum of each acceptor-labeled oligonucleotide by using  $(A^R(560)\epsilon^{\text{ssDNA}}(260)/A^{\text{ssDNA}}(260)\epsilon^R(560))$ , with  $\epsilon^R(560 \text{ nm})=91.000 \text{ M}^{-1}.\text{cm}^{-1}$ .

The distance  $R$  between donor and acceptor is calculated from the measured  $E$  value by using the Förster equation for FRET:

$$R = R_0 \sqrt[6]{\left(\frac{1}{E} - 1\right)},$$

where  $R_0$  is the Förster radius determined for each donor-acceptor pair.

### **$R_0$ Determination**

$R_0$  was measured by the method of Wu and Brand (Wu and Brand, 1994) for each donor-acceptor pair by using the following equations:  $R_0 = 0.211 \sqrt[6]{\kappa^2 n^{-4} \phi^D J(\lambda)}$  in Å.  $\kappa^2$  is the transition dipoles orientation factor estimated to be 2/3 for fluorophores that have a fast rotational diffusion rate in solution (Dale et al., 1979; Dale et al., 1980).  $n$  is the refractive index of the medium (1.4 for DNA aqueous solutions).  $\phi^D$  is the emission quantum yield of the donor.  $J(\lambda)$  [in  $\text{M}^{-1}.\text{cm}^{-1}.\text{(nm)}^4$ ] is the overlap integral between the donor emission spectrum and the acceptor absorbance spectrum defined by the equation

$$J(\lambda) = \frac{\sum_{\Delta\lambda} [F_D(\lambda)\epsilon_A(\lambda)\lambda^4 \Delta\lambda]}{\sum_{\Delta\lambda} [F_D(\lambda)\Delta\lambda]}, \text{ where } F_D(\lambda) \text{ is the donor emission spectrum and } \epsilon_A(\lambda) \text{ is}$$

the spectrum for acceptor extinction coefficients.

$\phi^D$  for each donor-labeled P-arm substrate was calculated as described in (Lakpawicz, 1999) by using the equation  $\phi^D = \phi^R \frac{I^D}{I^R} \frac{OD^R}{OD^D}$ , where  $\phi^R$  is the fluorescence quantum yield of a fluorescence standard (Fluka, Sigma-Aldrich);  $I^D$  and  $I^R$  are the fluorescence emission intensities of Bodipy-FI and the standard, respectively; and  $OD^D$  and  $OD^R$  are absorbance values of Bodipy-FI at 488 nm and the standard at 496 nm, respectively.  $\phi^R = 0.95 \pm 0.03$  at  $\lambda_{ex} = 496$  nm, when fluorescein is in 0.1 M NaOH (Brannon and Magde, 1978). The Bodipy-FI-labeled P-arm substrates (0.8  $\mu$ M) or the standard (0.4  $\mu$ M) were dissolved either in buffer A (see *Methods*) or 0.1 M NaOH, respectively. A Beckman DU 520 UV/VIS spectrometer was used to collect the ODs. Fluorescence spectra of the same solutions were recorded on a Fluoromax 2 instrument (Instruments S.A.) by using a slit width of 5 nm. Excitation with Xenon lamp was at 488 or 496 nm for Bodipy-FI or the standard, respectively. Emission spectra were collected over a wavelength range of 500-600 nm and corrected for buffer signals and lamp fluctuations. The emission maximum for Bodipy-FI and the fluorescein standard was at 520 nm when excited at 488 and 496 nm, respectively. Fluorescence intensities were determined by integrating the curve  $\pm 20$  nm around the emission peak.

The emission spectra  $F_D(\lambda)$  of Bodipy-FI-labeled P-arm substrates for  $J(\lambda)$  calculations were recorded as described in the previous paragraph.  $\epsilon_A(\lambda)$  for acceptor (tetramethylrhodamine, TAMRA) labeled P-arm substrates was obtained from absorbance spectra of 0.50  $\mu$ M substrate solutions (10 mM Tris-HCl pH 7.5, 50 mM NaCl, 1 mM EDTA) collected in the wavelength range of 190-800 nm on a HP8452A UV/VIS spectrophotometer. Absorbance spectra  $A(\lambda)$  were then converted to  $\epsilon_A(\lambda)$

spectra by using the “50 µg/ml rule” (i.e.,  $\varepsilon_A(\lambda) = \frac{A(\lambda)}{A(260nm)} \varepsilon_{DNA}(260nm)$ ), for  $\lambda = 500$

to 600 nm and  $\varepsilon_{DNA}(260nm) = \frac{50 * 10^{-3} \text{ g/l}}{Mr(DNA) * 1cm}$ , where  $Mr(DNA)$  is the molecular weight

of the DNA substrate in g/mol.  $J(\lambda)$  calculations and spectral data manipulations were done by using Microsoft Excel spreadsheets.

### **Anisotropy Measurements**

Steady-state anisotropies ( $r$ ) were measured for all Bodipy-FI-labeled or acceptor (TAMRA)-labeled P-arms both unbound and in the context of P-arm-six protein complex. Samples contained the labeled substrates (50 nM) in binding buffer (see above)

with or without six proteins.  $r$  was calculated from  $r = \frac{I_{VV} - GI_{VH}}{I_{VV} + 2GI_{VH}}$ .  $I$  is the fluorescence

intensity of the sample. The first and second letters in the subscript describe the positions of the excitation and emission polarizers, respectively ( $V$ , vertical;  $H$ , horizontal).  $G$  is the correction factor for differences in sensitivities of the detection system for vertically and horizontally polarized light and is equal to  $I_{HV}/I_{HH}$  (Lakowicz, 1999). Fluorescence intensities were measured on a Fluoromax 2 fluoimeter with autopolarizers (Instrument S.A.) using excitation wavelengths of 488 and 560 nm for Bodipy-FI and TAMRA, respectively. Emission was recorded over 500-540 nm and 570-610 nm ranges for Bodipy-FI and TAMRA, respectively.  $r$  values ranged 0.16-0.20 for unbound Bodipy-FI P-arms. Proteins addition increased  $r$  only slightly, in the range of 0.20-0.26.  $r$  values of acceptor-labeled P-arms were 0.18-0.24 and 0.22-0.25 with and without proteins, respectively. While the measured anisotropies suggest somewhat constrained rotational

motion of the dyes, we assumed they were low enough to justify the use of  $2/3$  for  $\kappa^2$ , as this value has been widely accepted for fluorophores with our anisotropies ranges (Lorenz et al., 1999; Mekler et al., 2002; Rasnik et al., 2004) for review see(Lakowicz, 1999).

## Supplemental References

Brannon, J. H., and Magde, D. (1978). Absolute quantum yield determination by thermal blooming. *J. Phys. Chem.* *82*, 705-709.

Dale, R. E., Eisinger, J., and Blumberg, W. E. (1979). The orientational freedom of molecular probes. The orientation factor in intramolecular energy transfer. *Biophys.* *26*, 161-194.

Dale, R. E., Eisinger, J., and Blumberg, W. E. (1980). The orientational freedom of molecular probes. The orientation factor in intramolecular energy transfer. *Biophys.* (erratum) *30*, 365.

Lakowicz, J. R. (1999). Energy transfer, In *Principles of Fluorescence Spectroscopy* (New York: Kluwer Academic/Plenum Publishers), pp. 367-391.

Lorenz, M., Hillisch, A., Goodman, S. D., and Diekmann, S. (1999). Global structure similarities of intact and nicked DNA complexed with IHF measured in solution by fluorescence resonance energy transfer. *Nucl. Acids Res.* *27*, 4619-4625.

Mekler, V., Kortkhonjia, E., Mukhopadhyay, J., Knight, J., Revyakin, A., Kapanidis, A. N., Niu, W., Ebright, Y. W., Levy, R., and Ebright, R. H. (2002). Structural organization of bacterial RNA polymerase holoenzyme and the RNA polymerase-promoter open complex. *Cell* *108*, 599-614.

Radman-Livaja, M., Biswas, T., Mierke, D., and Landy, A. (2005). Architecture of recombination intermediates visualized by In-gel FRET of  $\lambda$  integrase-Holliday junction-arm-DNA complexes. *Proc. Natl. Acad. Sci. USA* *102*, 3913-3920.

Rasnik, I., Myong, S., Cheng, W., Lohman, T. M., and Ha, T. (2004). DNA-binding orientation and domain conformation the *E. coli* rep helicase monomer bound to a partial duplex junction: Single-molecule studies of fluorescently labeled enzymes. *J. Mol. Biol.* *336*, 395-408.

Wu, P., and Brand, L. (1994). Resonance energy transfer: Methods and applications. *Annu. Biochem.* *218*, 1-13.

Table S1. Oligonucleotide Sequences

| oligonucleotide name    | sequence (5' to 3') (top strand)                                                                        | Length (bp) |
|-------------------------|---------------------------------------------------------------------------------------------------------|-------------|
| Parm                    | ATACATAGTGACTGCATATGTTGTGTTTTACAATATTATGTAGTCTG<br>TTTTTTATGCAAAATATAATTTAATATATTGATATTTATATAATTTTACATA | 99          |
| X1/X1.5/X2 <sup>#</sup> | GGTGCATATGTTGTGTTTTACAGTATTATGTAGTCTGTTTTTATGG                                                          | 47          |
| X1/X1.5/ <del>X2</del>  | ACTGCATATGTTGTGTTTTACAGTATCGCCGCACGCACCCCTTATGC                                                         | 47          |
| <del>X1</del> /X1.5/X2  | ACTGCACGCAGCACTGGGGACAGTATTATGTAGTCTGTTTTTATGC                                                          | 47          |
| X1.5                    | GGTTTTACAGTATTATGTGG                                                                                    | 19          |
| X2F                     | ACAGTATTATGTAGTCTGTTTTTTATGCAAAATCTAATT                                                                 | 39          |
| P2X1                    | TAGGATACATAGTGACTGCATATGTTGTGTTTTCGAATAG                                                                | 40          |

<sup>#</sup> X1 and X2 are underlined.

Table S2.  $R_0$  Measurements

| Donor | $\Phi^D$ | Acceptor | $J(\lambda)^{\#}$ ( $M^{-1}\cdot cm^{-1}\cdot nm^4/10^{15}$ ) | $R_0$ % ( $\text{\AA}$ ) |
|-------|----------|----------|---------------------------------------------------------------|--------------------------|
| fP2   | 0.81     | fX1      | 2.20                                                          | 54.5                     |
| fP2   | 0.81     | fX1.5    | 2.41                                                          | 55.9                     |
| fP2   | 0.81     | fH2A     | 2.97                                                          | 57.9                     |
| fP2   | 0.81     | fH2B     | 2.79                                                          | 57.3                     |
| fP2   | 0.81     | fH2C     | 3.08                                                          | 58.3                     |
| fP2   | 0.81     | fH2D     | 2.65                                                          | 56.8                     |
| fX1   | 0.77     | fX1.5    | 2.49                                                          | 55.6                     |
| fX1   | 0.77     | fH2A     | 3.48                                                          | 58.9                     |
| fX1   | 0.77     | fH2B     | 2.54                                                          | 55.9                     |
| fX1   | 0.77     | fH2C     | 2.34                                                          | 55.2                     |
| fX1   | 0.77     | fH2D     | 2.74                                                          | 56.7                     |
| fF    | 0.82     | fX1      | 2.20                                                          | 55.2                     |
| fF    | 0.82     | fX1.5    | 1.69                                                          | 52.8                     |
| fF    | 0.82     | fH2A     | 1.95                                                          | 54.1                     |
| fF    | 0.82     | fH2B     | 1.63                                                          | 52.5                     |
| fF    | 0.82     | fH2C     | 2.40                                                          | 56.0                     |
| fF    | 0.82     | fH2D     | 2.66                                                          | 57.0                     |
| fH2A  | 0.86     | fX1.5    | 2.05                                                          | 55.0                     |
| fH2A  | 0.86     | fH2B     | 2.28                                                          | 56.0                     |
| fH2A  | 0.86     | fH2C     | 1.68                                                          | 53.2                     |
| fH2A  | 0.86     | fH2D     | 1.82                                                          | 53.9                     |
| fH2B  | 0.74     | fX1.5    | 1.82                                                          | 52.5                     |
| fH2B  | 0.74     | fH2C     | 2.62                                                          | 55.8                     |
| fH2B  | 0.74     | fH2D     | 2.28                                                          | 54.6                     |
| fH2C  | 0.70     | fX1.5    | 1.76                                                          | 51.8                     |
| fH2C  | 0.70     | fH2D     | 2.13                                                          | 53.5                     |
| fH2D  | 0.88     | fX1.5    | 2.28                                                          | 56.2                     |

\*  $\Phi^D$  is the fluorescence quantum yield of the donor.

$$^{\#}J(\lambda) = \frac{\sum_{\Delta\lambda} [F_D(\lambda)\epsilon_A(\lambda)\lambda^4\Delta\lambda]}{\sum_{\Delta\lambda} [F_D(\lambda)\Delta\lambda]} \quad \text{Where } F_D(\lambda) \text{ is the fluorescence intensity of the donor and}$$

$\epsilon_A(\lambda)$  is the extinction coefficient of the acceptor at wavelength  $\lambda$ .

$^{\%}R_0 = 0.211\sqrt{\kappa^2 n^{-4} \phi^D J(\lambda)}$ ,  $R_0$  is the Förster distance between donor and acceptor.  $\kappa^2$  (transition dipoles orientation factor) = 2/3 and  $n$  (refractive index of the medium) = 1.4.
